# Supplementary material
Source: PubMed Central journal article supplement (PMC6443114)
Supplement: dez002_supplementary_figure_s1.pdf [file dez002_supplementary_figure_s1.pdf]

human reproduction SUPPLEMENTARY DATA

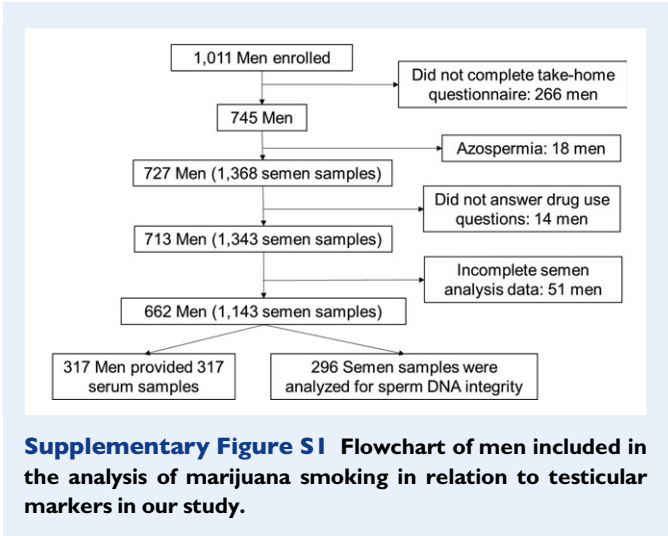

**Supplementary Figure S1** Flowchart of men included in the analysis of marijuana smoking in relation to testicular markers in our study.
