# Supplementary material
Source: PubMed Central journal article supplement (PMC6443114)
Supplement: dez002_supplementary_figure_s2.pdf [file dez002_supplementary_figure_s2.pdf]

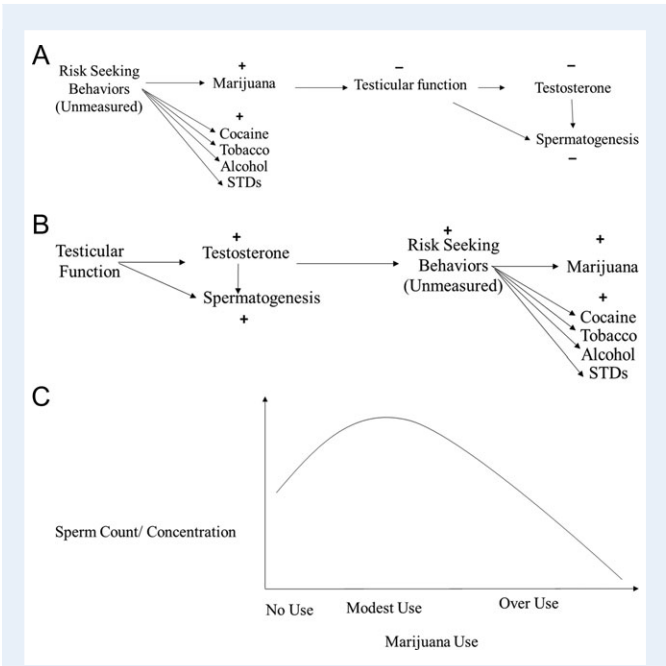

**Supplementary Figure S2 Association between marijuana use and spermatogenesis.** **A:** *A priori* assumed causal structure of the association between marijuana use and spermatogenesis. **B:** Alternative causal structure of the association between marijuana use and spermatogenesis. **C:** Proposed underlying association of marijuana use and spermatogenesis.
