# Supplementary material
Source: PubMed Central journal article supplement (PMC6443114)
Supplement: dez002_supplementary_table_si.pdf [file dez002_supplementary_table_si.pdf]

**Supplementary Table S1 Demographic and semen sample characteristics of men included in and men excluded from analyses.**

| Baseline characteristics (at visit 1)                 | Included (662 men and 1143 visits) | Excluded (349 men and 642 visits) | Missing <sup>b</sup> | P-value <sup>c</sup> |
|-------------------------------------------------------|------------------------------------|-----------------------------------|----------------------|----------------------|
|                                                       | N (%) / Mean (SD) <sup>a</sup>     | N (%) / Mean (SD)                 |                      |                      |
| Ever marijuana use                                    | 365 (55)                           | 36 (51)                           | 278                  | 0.48                 |
| Ever cocaine use                                      | 148 (22)                           | 11 (15)                           | 278                  | 0.18                 |
| Age (years)                                           | 36.3 (5.11)                        | 36.5 (6.07)                       | 7                    | 0.94                 |
| BMI (kg/m <sup>2</sup> )                              | 27.5 (4.70)                        | 28.5 (5.92)                       |                      | 0.008                |
| Race                                                  |                                    |                                   |                      | 0.0004               |
| Caucasian                                             | 581 (88)                           | 276 (79)                          |                      |                      |
| Black/African American                                | 15 (2)                             | 24 (7)                            |                      |                      |
| Asian                                                 | 33 (5)                             | 26 (7)                            |                      |                      |
| Native American/Alaska Native                         | 33 (5)                             | 23 (7)                            |                      |                      |
| Education                                             |                                    |                                   | 268                  | 0.07                 |
| Below college                                         | 106 (16)                           | 20 (24)                           |                      |                      |
| College or Graduate Degree                            | 554 (84)                           | 63 (76)                           |                      |                      |
| Ever Smokers                                          | 190 (29)                           | 114 (33)                          |                      | 0.19                 |
| Coffee ≥5 cup/week                                    | 407 (61)                           | 48 (68)                           |                      | 0.31                 |
| Alcohol ≥1 days/week                                  | 453 (68)                           | 50 (61)                           |                      | 0.17                 |
| History of reproductive tract diseases <sup>d</sup>   | 199 (30)                           | 102 (29)                          |                      | 0.78                 |
| History of sexually transmitted diseases <sup>e</sup> | 67 (10)                            | 9 (11)                            | 266                  | 0.84                 |
| History of reproductive tract surgeries <sup>f</sup>  | 78 (12)                            | 43 (12)                           |                      | 0.80                 |
| Infertility Diagnosis                                 |                                    |                                   | 522                  | 0.02                 |
| Male Factor                                           | 79 (25)                            | 63 (37)                           |                      |                      |
| Female Factor                                         | 110 (35)                           | 51 (29)                           |                      |                      |
| Unexplained                                           | 128 (41)                           | 58 (34)                           |                      |                      |
| <b>Semen Quality Parameters</b>                       |                                    |                                   |                      |                      |
| Ejaculate volume, mL                                  | 2.94 (1.47)                        | 2.86 (1.46)                       | 38                   | 0.30                 |
| Sperm concentration, million/mL                       | 82.9 (78.7)                        | 81.4 (88.6)                       | 116                  | 0.82                 |
| Total sperm count, million                            | 219 (213)                          | 215 (261)                         | 120                  | 0.55                 |
| %Total Sperm Motility                                 | 48.0 (22.2)                        | 43.1 (25.4)                       | 116                  | 0.001                |
| %Progressive Sperm Motility                           | 28.6 (15.0)                        | 25.3 (16.5)                       | 123                  | 0.0002               |
| Sperm morphology, % normal                            | 6.64 (3.74)                        | 6.32 (4.23)                       | 204                  | 0.05                 |

Abbreviations: BMI; body mass index, mins; minutes.

<sup>a</sup>N (%) is presented for categorical/binary variables and mean (standard deviation) is presented for continuous variables.

<sup>b</sup>Missing observations are from the excluded men. Education was missing for two men. Infertility diagnosis was missing before 2004.

<sup>c</sup>From Chi-square (or Fisher's exact test when appropriate) for discrete variables and Kruskal–Wallis for continuous variables.

<sup>d</sup>Groin injury, testes not always in scrotum, varicocele, testicular torsion, testicular injury, hernia, epididymitis, prostatitis and seminal vesicle infection.

<sup>e</sup>Syphilis, gonorrhoea, mycoplasma/ureaplasma, chlamydia, trichomonas, herpes, human papilloma virus, lymphogranuloma, group-B strep or other sexually transmitted diseases.

<sup>f</sup>Varicocelectomy, orchidopexy, hydrocelectomy, repair of hernia, urethra, or hypospadias, sympathectomy or bladder neck surgery.
