# Supplementary material
Source: PubMed Central journal article supplement (PMC6443114)
Supplement: dez002_supplementary_table_sii.pdf [file dez002_supplementary_table_sii.pdf]

**Supplementary Table SII Distribution of semen parameters and hormone concentrations.**

| <b>Semen Quality Parameters 662 Men<br/>(1143 Semen Samples)</b> | <b>Mean (SD), [Range]</b> | <b>Median (IQR)</b> | <b>&lt;WHO Lower Reference<br/>Limits n, %<sup>a</sup></b> |
|------------------------------------------------------------------|---------------------------|---------------------|------------------------------------------------------------|
| Ejaculate volume, mL                                             | 2.94 (1.47), [0.2, 11]    | 2.80 (1.80)         | 169 (15)                                                   |
| Sperm concentration, million/mL                                  | 82.9 (78.7), [1.2, 750]   | 62.2 (84.8)         | 112 (10)                                                   |
| Total sperm count, million                                       | 219 (213), [1.35, 2359]   | 156 (222)           | 108 (9)                                                    |
| Total Sperm Motility, %                                          | 48 (22.2), [0, 97]        | 49 (35.92)          | 417 (36)                                                   |
| Sperm Progressive Motility, %                                    | 28.6 (15), [0, 83]        | 27.59 (22.47)       | 677 (59)                                                   |
| Sperm morphology, % normal                                       | 6.64 (3.74), [0, 24]      | 6 (5)               | 238 (21)                                                   |
| <b>Sperm DNA Damage, 296 Men</b>                                 |                           |                     |                                                            |
| Comet extent, $\mu\text{m}$                                      | 130 (38.0), [47.6, 249]   | 127 (47.7)          | –                                                          |
| Comet Tail DNA, %                                                | 32.2 (14.9), [9.90, 79.7] | 27.6 (22.9)         | –                                                          |
| Comet Tail distributed moment, $\mu\text{m}$                     | 57.1 (14.6), [25.7, 107]  | 55.7 (19.5)         | –                                                          |
| Comet Cells with high DNA damage, n                              | 7.86 (11.6), [0, 95.0]    | 4.00 (10.0)         | –                                                          |
| <b>Hormone Concentrations, 317 Men</b>                           |                           |                     |                                                            |
| FSH, IU/L                                                        | 8.98 (5.81), [1.14, 41.8] | 7.49 (4.73)         | –                                                          |
| LH, IU/L                                                         | 10.9 (5.3), [0.85, 47.5]  | 9.71 (6.00)         | –                                                          |
| Inhibin-B, pg/mL                                                 | 172 (77.8), [7.80, 702]   | 165 (82.5)          | –                                                          |
| Estradiol, pg/mL                                                 | 29.1 (12.6), [10.0, 71.0] | 29.0 (13.0)         | –                                                          |
| Total Testosterone, ng/dL                                        | 422 (139), [148, 1158]    | 401 (158)           | –                                                          |
| SHBG, nmol/L                                                     | 28.0 (11.9), [6.50, 98.6] | 26.0 (13.9)         | –                                                          |

Abbreviations: SD; standard deviation; IQR, interquartile range; WHO; World Health Organization, FSH; follicle stimulating hormone, LH; luteinizing hormone, and SHBG; sex hormone-binding globulin.

<sup>a</sup>WHO lower reference limits (2010): ejaculate volume <1.5 mL; sperm concentration <15 million/mL; total sperm count <39 million; total motile sperm <40%; progressive motile sperm <32%, and normal sperm morphology <4% using 'strict' Tygerberg method.
