# Supplementary material
Source: PubMed Central journal article supplement (PMC6443114)
Supplement: dez002_supplementary_table_siii.pdf [file dez002_supplementary_table_siii.pdf]

**Supplementary Table SIII Unadjusted semen quality parameters and serum reproductive hormone concentrations according to marijuana smoking status.**

| Reproductive parameters                 | Marijuana smoking                      |                                     |                                     |                                       |
|-----------------------------------------|----------------------------------------|-------------------------------------|-------------------------------------|---------------------------------------|
|                                         | Unadjusted means (95% CI) <sup>a</sup> |                                     |                                     |                                       |
| Semen Quality Parameters                | Never<br>N = 297 men,<br>490 samples   | Ever<br>N = 365 men,<br>653 samples | Past<br>N = 291 men,<br>526 samples | Current<br>N = 74 men,<br>127 samples |
| Ejaculate volume, mL                    | 2.83 (2.66, 3.01)                      | 2.51 (2.38, 2.66)*                  | 2.54 (2.39, 2.70)*                  | 2.43 (2.15, 2.74)                     |
| Sperm concentration, million/mL         | 51.6 (46.0, 57.8)                      | 67.0 (60.5, 74.3)*                  | 67.7 (60.4, 75.9)*                  | 64.3 (51.5, 80.3)                     |
| Total sperm count, million              | 145 (129, 163)                         | 167 (151, 186)                      | 169.7 (151, 191)*                   | 158 (125, 198)                        |
| % Total Sperm Motility                  | 46.8 (44.4, 49.3)                      | 49.9 (47.7, 52.1)                   | 49.7 (47.3, 52.2)                   | 50.6 (45.8, 55.5)                     |
| % Progressive Sperm Motility            | 28.2 (26.5, 29.9)                      | 30.2 (28.7, 31.8)                   | 30.1 (28.5, 31.8)                   | 30.6 (27.3, 33.9)                     |
| % Normal Sperm Morphology               | 6.70 (6.27, 7.13)                      | 6.81 (6.43, 7.19)                   | 6.91 (6.48, 7.34)                   | 6.42 (5.58, 7.27)                     |
| <b>Sperm DNA Damage</b>                 | <b>N = 146</b>                         | <b>N = 150</b>                      | <b>N = 113</b>                      | <b>N = 37</b>                         |
| Comet Extent, μm                        | 124 (118, 131)                         | 123 (117, 130)                      | 126 (119, 133)                      | 116 (105, 128)                        |
| Comet Tail DNA, %                       | 30.1 (27.9, 32.4)                      | 28.1 (26.1, 30.2)                   | 27.6 (25.3, 30.0)                   | 29.6 (25.6, 34.4)                     |
| Comet Tail Distributed Moment (TDM), μm | 55.4 (53.1, 57.8)                      | 55.0 (52.7, 57.3)                   | 56.6 (53.9, 59.4)                   | 50.4 (46.3, 54.8)                     |
| Comet Cells with High DNA damage, n     | 8.13 (6.66, 9.93)                      | 7.61 (6.20, 9.33)                   | 7.96 (6.33, 10.0)                   | 6.51 (4.18, 10.15)                    |
| <b>Hormone Concentrations</b>           | <b>N = 149</b>                         | <b>N = 168</b>                      | <b>N = 131</b>                      | <b>N = 37</b>                         |
| FSH, IU/L                               | 8.34 (7.68, 9.06)                      | 7.28 (6.74, 7.87)*                  | 7.33 (6.71, 8.00)*                  | 7.12 (6.03, 8.41)                     |
| LH, IU/L                                | 10.1 (9.38, 10.9)                      | 9.49 (8.84, 10.2)                   | 9.61 (8.85, 10.4)                   | 9.10 (7.81, 10.6)                     |
| Inhibin-B, pg/mL                        | 152 (140, 165)                         | 156 (145, 169)                      | 153 (140, 166)                      | 171 (145, 201)                        |
| Estradiol, pg/mL                        | 26.2 (24.1, 28.5)                      | 25.5 (23.6, 27.6)                   | 26.5 (24.2, 29.0)                   | 22.3 (18.8, 26.4)                     |
| Testosterone, ng/dL                     | 405 (384, 426)                         | 398 (379, 418)                      | 397 (376, 420)                      | 400 (361, 445)                        |
| SHBG, nmol/L                            | 25.7 (24.0, 27.6)                      | 25.6 (24.0, 27.3)                   | 24.8 (23.0, 26.6)                   | 28.7 (25.0, 32.9)                     |

Abbreviations: CI; confidence interval, N; number, FSH; follicle stimulating hormone, LH; luteinizing hormone, and SHBG; sex hormone-binding globulin; DNA, deoxyribonucleic acid.

<sup>a</sup>Unadjusted marginal means were estimated using linear mixed models and a random intercept for each man for the semen quality parameters and linear regression models for the reproductive hormone concentrations and DNA integrity.

\* P < 0.05 compared to never.
