# Supplementary material
Source: PubMed Central journal article supplement (PMC6443114)
Supplement: dez002_supplementary_table_siv.pdf [file dez002_supplementary_table_siv.pdf]

**Supplementary Table SIV Adjusted means of the proportions (95% CI) of semen parameters below the WHO lower reference values associated with marijuana smoking status and cocaine (USING THE FIRST SAMPLE GIVEN PER MAN; CLOSEST TO ASSESSMENT OF MARIJUANA SMOKING).**

| Semen Quality Parameters<br><WHO Lower Reference Limits <sup>b</sup> | Adjusted <sup>a</sup> proportions (95% CI) associated with marijuana smoking |                     |                     |                   |
|----------------------------------------------------------------------|------------------------------------------------------------------------------|---------------------|---------------------|-------------------|
|                                                                      | Never(ref)<br>297 Men                                                        | Ever<br>365 Men     | Past<br>291 Men     | Current<br>74 Men |
| <1.5 mL Ejaculate volume                                             | 14.9 (10.2, 21.1)                                                            | 15.4 (11.0, 21.2)   | 14.2 (9.8, 20.8)    | 21.5 (12.1, 35.3) |
| <15 million/mL Sperm concentration                                   | 12.4 (8.0, 18.5)                                                             | 5.4 (3.2, 9.1)**    | 5.4 (3.1, 9.3)*     | 5.4 (2.2, 12.5)   |
| <39 million of Total sperm count                                     | 9.1 (5.0, 16.2)                                                              | 3.3 (1.6, 6.8)**    | 2.9 (1.3, 6.3)**    | 5.1 (1.9, 13.0)   |
| <40% Total Sperm Motility                                            | 41.6 (32.4, 51.4)                                                            | 26.2 (19.3, 34.5)** | 25.5 (18.5, 34.0)** | 29.4 (18.5, 43.4) |
| <32% Sperm Progressive Motility                                      | 58.8 (49.5, 67.6)                                                            | 48.3 (39.5, 57.1)*  | 48.2 (39.2, 57.4)*  | 48.4 (34.8, 62.2) |
| <4% Normal sperm morphology                                          | 22.6 (17.1, 29.2)                                                            | 20.3 (15.6, 26.1)   | 18.6 (13.8, 24.5)   | 28.6 (18.6, 41.3) |
| Semen Quality Parameters<br><WHO Lower Reference Limits <sup>b</sup> | Adjusted <sup>c</sup> proportions (95% CI) associated with cocaine use       |                     |                     |                   |
|                                                                      | Never(ref)<br>514 Men                                                        | Ever<br>148 Men     | Past<br>141 Men     | Current<br>7 Men  |
| <1.5 mL Ejaculate volume                                             | 14.3 (10.6, 18.9)                                                            | 18.6 (11.6, 28.5)   | 17.7 (10.9, 27.6)   | 37.1 (9.5, 76.8)  |
| <15 million/mL Sperm concentration                                   | 6.8 (4.4, 10.3)                                                              | 13.1 (7.2, 22.7)*   | 12.9 (7.0, 22.5)    | 18.5 (2.5, 67.0)  |
| <39 million of Total sperm count                                     | 4.1 (2.2, 7.7)                                                               | 11.9 (5.6, 23.3)*   | 11.6 (5.4, 23.0)*   | 18.7 (2.4, 68.6)  |
| <40% Total Sperm Motility                                            | 31.2 (24.0, 39.3)                                                            | 38.1 (27.2, 50.2)   | 39.2 (28.8, 51.7)   | 20.6 (3.0, 68.8)  |
| <32% Sperm Progressive Motility                                      | 53.6 (45.3, 61.6)                                                            | 51.1 (39.6, 62.5)   | 52.3 (40.4, 63.9)   | 35.0 (9.2, 74.1)  |
| <4% Normal sperm morphology                                          | 20.5 (16.4, 25.4)                                                            | 24.3 (16.8, 34.0)   | 25.0 (17.2, 34.9)   | 12.8 (1.7, 55.7)  |

Abbreviations: WHO; World Health Organization; 95% CI, 95% confidence interval.

<sup>a</sup>Adjusted mean proportions were estimated using generalised linear models with binary distribution and logit link. Models were adjusted for age (years, continuous), race (white/not), sexual abstinence time (days, categorical), body mass index (kg/m<sup>2</sup>, continuous), tobacco smoking (yes/no), coffee (binary) and alcohol intake (binary), cocaine use (yes/no), and calendar year (continuous). Motility models were further adjusted for time elapsed between semen collection and analysis.

<sup>b</sup>WHO lower reference limits (2010): ejaculate volume <1.5 mL; sperm concentration <15 million/mL; total sperm count <39 million; total motile sperm <40%; progressive motile sperm <32%, and normal sperm morphology <4% using 'strict' Tygerberg method.

<sup>c</sup>Adjusted mean proportions were estimated using generalised linear models with binary distribution and logit link. Models were adjusted for age (years, continuous), race (white/not), sexual abstinence time (days, categorical), body mass index (kg/m<sup>2</sup>, continuous), tobacco smoking (yes/no), coffee (binary) and alcohol intake (binary), marijuana smoking (yes/no), and calendar year (continuous). Motility models were further adjusted for time elapsed between semen collection and analysis.

\*: P value ≤ 0.05, \*\*: P value < 0.01 compared to never
