# Supplementary material
Source: PubMed Central journal article supplement (PMC6443114)
Supplement: dez002_supplementary_table_svi.pdf [file dez002_supplementary_table_svi.pdf]

**Supplementary Table SVI** Adjusted semen quality parameters according to marijuana smoking status among men in couples without a male factor infertility diagnosis (239 men who provided 609 semen samples).

| Reproductive parameters         | Marijuana smoking<br>Adjusted means (95% CI) <sup>a</sup> |                                     |                                     |                                      |
|---------------------------------|-----------------------------------------------------------|-------------------------------------|-------------------------------------|--------------------------------------|
|                                 | Never<br>N = 95 men,<br>226 samples                       | Ever<br>N = 144 men,<br>383 samples | Past<br>N = 122 men,<br>322 samples | Current<br>N = 22 men,<br>61 samples |
| Ejaculate volume, mL            | 2.50 (2.19, 2.85)                                         | 2.25 (2.05, 2.47)                   | 2.30 (2.08, 2.54)                   | 2.00 (1.63, 2.46)                    |
| Sperm concentration, million/mL | 61.8 (50.6, 75.5)                                         | 69.4 (60.2, 80.0)                   | 65.5 (56.4, 76.1)                   | 94.3 (68.9, 129)*                    |
| Total sperm count, million      | 153 (126, 186)                                            | 156 (136, 179)                      | 151 (130, 175)                      | 187 (138, 254)                       |
| % Total Sperm Motility          | 51.8 (46.0, 57.5)                                         | 52.7 (48.1, 57.3)                   | 51.3 (46.5, 56.0)                   | 60.7 (52.2, 69.2)                    |
| % Progressive Sperm Motility    | 29.5 (25.7, 33.4)                                         | 30.0 (26.8, 33.1)                   | 29.3 (26.1, 32.6)                   | 33.5 (27.8, 39.2)                    |
| % Normal Sperm Morphology       | 7.34 (6.52, 8.16)                                         | 7.18 (6.61, 7.76)                   | 7.26 (6.64, 7.87)                   | 6.82 (5.56, 8.08)                    |

Abbreviations: CI; confidence interval, N; number, FSH; follicle stimulating hormone, LH; luteinizing hormone, and SHBG; sex hormone-binding globulin; DNA, deoxyribonucleic acid.

<sup>a</sup>Adjusted marginal means were estimated using linear mixed models and a random intercept for each man for the semen quality parameters and linear regression models for the reproductive hormone concentrations and DNA integrity. The adjusted marginal means in each exposure category were adjusted for the covariates at their average levels for continuous variables and weighted average level of categorical variable in the model including age (years, continuous), race (white/ not), sexual abstinence time (days, categorical), body mass index (kg/m<sup>2</sup>, continuous), tobacco smoking (yes/no), coffee (binary) and alcohol intake (binary), cocaine use (yes/no), and calendar year (continuous). Motility models were further adjusted for time elapsed between semen collection and analysis.

\*P < 0.05 compared to never.
