# Supplementary material
Source: PubMed Central journal article supplement (PMC6443114)
Supplement: dez002_supplementary_table_sviii.pdf [file dez002_supplementary_table_sviii.pdf]

**Supplementary Table SVIII Adjusted semen quality parameters according to marijuana smoking status.**

| Reproductive parameters         | Marijuana smoking                                |                                     |                                     |                                       |
|---------------------------------|--------------------------------------------------|-------------------------------------|-------------------------------------|---------------------------------------|
|                                 | Adjusted means (95% CI) <sup>a</sup>             |                                     |                                     |                                       |
| Semen Quality Parameters        | Never (Reference)<br>N = 293 men,<br>485 samples | Ever<br>N = 362 men,<br>650 samples | Past<br>N = 289 men,<br>524 samples | Current<br>N = 73 men,<br>126 samples |
| Ejaculate volume, mL            | 2.51 (2.30, 2.73)                                | 2.40 (2.26, 2.54)                   | 2.42 (2.27, 2.58)                   | 2.30 (2.04, 2.60)                     |
| Sperm concentration, million/mL | 45.2 (38.4, 53.2)                                | 62.8 (56.0, 70.4)*                  | 63.6 (56.2, 72.1)*                  | 59.5 (47.2, 75.0)*                    |
| Total sperm count, million      | 113 (96.1, 133)                                  | 150 (134, 168)*                     | 153 (135, 173)*                     | 139 (110, 175)                        |
| % Total Sperm Motility          | 45.4 (41.4, 49.4)                                | 49.4 (46.2, 52.5)*                  | 49.4 (46.1, 52.7)*                  | 49.4 (43.9, 54.8)                     |
| % Progressive Sperm Motility    | 27.2 (24.5, 29.9)                                | 29.6 (27.5, 31.8)                   | 29.7 (27.4, 32.0)                   | 29.4 (25.6, 33.1)                     |
| % Normal Sperm Morphology       | 6.43 (5.80, 7.06)                                | 6.80 (6.36, 7.24)                   | 6.91 (6.43, 7.39)                   | 6.37 (5.47, 7.26)                     |

Abbreviations: CI; confidence interval, N; number.

<sup>a</sup>Adjusted marginal means were estimated using linear mixed models and a random intercept for each man for the semen quality parameters and linear regression models for the reproductive hormone concentrations and DNA integrity. The adjusted marginal means in each exposure category were adjusted for the covariates at their average levels for continuous variables and weighted average level of categorical variable in the model including age (years, continuous), race (white/not), sexual abstinence time (days, categorical), body mass index (kg/m<sup>2</sup>, continuous), tobacco smoking (yes/no), coffee (binary) and alcohol intake (binary), cocaine use (yes/no), and calendar year (continuous), with further adjusting for stress levels. Motility models were further adjusted for time elapsed between semen collection and analysis.

\*P ≤ 0.05 compared to never, which were marginally significant in the original analysis compared to the new sensitivity analysis with further adjustment for stress levels.
